# Supplementary material for: How Older People Experience the Age-Friendliness of Their City: Development of the Age-Friendly Cities and Communities Questionnaire
Source: Int J Environ Res Public Health. 2020 Sep 20;17(18):6867. doi: 10.3390/ijerph17186867 (PMC7559304; doi:10.3390/ijerph17186867)
Supplement: Supplementary file 1 [file ijerph-17-06867-s001.pdf]

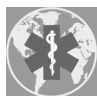

Article

# How Older People Experience the Age-Friendliness of Their City: Development of the Age-Friendly Cities and Communities Questionnaire

Jeroen Dikken <sup>1,2</sup>, Rudy F.M. van den Hoven <sup>1</sup>, Willeke H. van Staalduinen <sup>3</sup>,  
Loes M.T. Hulsebosch-Janssen <sup>4</sup> and Joost van Hoof <sup>1,5,\*</sup>

<sup>1</sup> Chair of Urban Ageing, Faculty of Social Work & Education, The Hague University of Applied Sciences, Johanna Westerdijkplein 75, 2521 EN Den Haag, Netherlands; J.Dikken@hhs.nl (J.D.); r.f.m.vandenhoven@hhs.nl (R.F.M.v.d.H.)

<sup>2</sup> Faculty of Health, Nutrition & Sport, The Hague University of Applied Sciences, Johanna Westerdijkplein 75, 2521 EN Den Haag, Netherlands

<sup>3</sup> AFEdeMy—Academy on age-friendly environments in Europe, Buurtje 2, 2802 BE Gouda, Netherlands; willeke@afedemy.eu

<sup>4</sup> Hulsebosch Advies, Lissenvaart 43, 2724 SJ Zoetermeer, Netherlands; hulsebosch@hm-advies.nl

<sup>5</sup> Institute of Spatial Management, Faculty of Environmental Engineering and Geodesy, Wrocław University of Environmental and Life Sciences, ul. Grunwaldzka 55, 50-357 Wrocław, Poland

\* Correspondence: j.vanhoof@hhs.nl; Tel.: +31-6-23381404

Received: 5 September 2020; Accepted: 16 September 2020; Published: date

**Supplementary Table S1.** Reasons for item exclusion in all steps for the Age-Friendly Cities and Communities Questionnaire (AFCCQ).

| Item Nr.                              | Item Text                                                                                                          | Step 3 I-CVI <sup>a</sup> | Step 4 Readability | Step 5 I-CVI <sup>b</sup> | Step 6 EFA  | Step 7 CFA  | Reason for Exclusion                          |
|---------------------------------------|--------------------------------------------------------------------------------------------------------------------|---------------------------|--------------------|---------------------------|-------------|-------------|-----------------------------------------------|
| <b>Domain 1: Housing</b>              |                                                                                                                    |                           |                    |                           |             |             |                                               |
| 1                                     | I can pay my living expenses (rent/mortgage) without any problem.                                                  | 1.0                       | 8.7                | 1.0                       | 0.67        | <0.70       | Low loading CFA                               |
| 2                                     | My house is well maintained.                                                                                       | 0.7                       | -                  | -                         | -           | -           | Exclusion I-CVI consensus                     |
| 3                                     | My house has the facilities and adaptations that I need.                                                           | 1.0                       | 8.6                | 1.0                       | 0.51        | <0.60       | Low loading CFA                               |
| 4                                     | <b>My house is accessible to me.</b>                                                                               | <b>0.9</b>                | <b>8.3</b>         | <b>1.0</b>                | <b>0.76</b> | <b>0.95</b> | <b>Included</b>                               |
| 5                                     | I can pay water, electricity, gas and municipal tax.                                                               | 0.8                       | -                  | -                         | -           | -           | Exclusion I-CVI consensus                     |
| 6                                     | I believe my city has sufficient affordable and suitable homes for older people.                                   | 1.0                       | 9.3                | 0.75                      | -           | -           | Exclusion I-CVI consensus                     |
| 7                                     | There are sufficient lifetime homes in my city.                                                                    | 0.6                       | -                  | -                         | -           | -           | Exclusion I-CVI score                         |
| 8                                     | If necessary, it is possible and affordable to have the necessary adjustments made to my home.                     | 0.8                       | -                  | -                         | -           | -           | Exclusion I-CVI consensus                     |
| 9                                     | <b>My house is accessible to the people who come to visit me.</b>                                                  | <b>0.9</b>                | <b>9.3</b>         | <b>1.0</b>                | <b>0.77</b> | <b>0.77</b> | <b>Included</b>                               |
| 10                                    | I feel safe and secure in my neighbourhood.                                                                        | 1.0                       | 9.9                | 1.0                       | 0.41        | <0.70       | Low loading CFA                               |
| 11                                    | My house is easy to keep clean.                                                                                    | 0.8                       | -                  | -                         | -           | -           | Exclusion I-CVI consensus                     |
| <b>Domain 2: Social Participation</b> |                                                                                                                    |                           |                    |                           |             |             |                                               |
| 12                                    | For me, there are enough social, cultural or educational activities or other forms of leisure in my neighbourhood. | 1.0                       | 8.6                | 1.0                       | 0.64        | x           | Problematic standardised residual covariances |
| 13                                    | There are enough sports activities available to me (alone or in a group) in my city.                               | 0.9                       | 8.6                | 1.0                       | 0.56        | x           | Problematic standardised residual covariances |

|                                                     |                                                                                                                                               |     |     |      |      |       |                           |
|-----------------------------------------------------|-----------------------------------------------------------------------------------------------------------------------------------------------|-----|-----|------|------|-------|---------------------------|
| 14                                                  | For me, there are plenty of opportunities in the city to participate in religious activities.                                                 | 0.8 | -   | -    | -    | -     | Exclusion I-CVI consensus |
| 15                                                  | There are plenty of interesting activities in my neighbourhood.                                                                               | 0.9 | 8.9 | 0.75 | -    | -     | Exclusion I-CVI consensus |
| 16                                                  | <b>There are enough opportunities to meet people in my neighbourhood.</b>                                                                     | 0.9 | 9.1 | 1.0  | 0.67 | 0.71  | Included                  |
| 17                                                  | My neighborhood offers enough activities to participate in.                                                                                   | 0.8 | -   | -    | -    | -     | Exclusion I-CVI consensus |
| 18                                                  | The number of times that I see or speak to friends or family a week is sufficient.                                                            | 0.9 | 9.7 | 1.0  | x    | -     | Communalities < 40        |
| 19                                                  | If necessary, I can get special community transport. ( <i>Moved to the domain of Community support and health services</i> )                  | 0.8 | 8.9 | 1.0  | 0.62 | <0.50 | Low loading CFA           |
| 20                                                  | The relationship/contact between the people in the neighbourhood is good.                                                                     | 0.9 | 8.0 | 0.88 | 0.45 | <0.50 | Low loading CFA           |
| 21                                                  | Amenities in my neighbourhood are easily accessible.                                                                                          | 1.0 | 9.4 | 0.88 | x    | -     | Cross-loading EFA         |
| 22                                                  | <b>Activities and events are organised in places that are accessible to me.</b>                                                               | 1.0 | 9.1 | 0.88 | 0.66 | 0.79  | Included                  |
| 23                                                  | Activities and events are organised at convenient times for me.                                                                               | 0.7 | -   | -    | -    | -     | Exclusion I-CVI consensus |
| 24                                                  | Activities and events are affordable for me. ( <i>Moved to the domain of Financial situation</i> )                                            | 0.9 | 9.1 | 1.0  | 0.41 | <0.70 | Low loading CFA           |
| 25                                                  | <b>The information about activities and events is enough for me and also suitable for me.</b>                                                 | 1.0 | 9.0 | 0.88 | 0.76 | 0.78  | Included                  |
| 26                                                  | <b>I find the range of events and activities sufficiently varied.</b>                                                                         | 0.9 | 9.1 | 0.88 | 0.77 | 0.80  | Included                  |
| <b>Domain 3: Respect and Social Inclusion</b>       |                                                                                                                                               |     |     |      |      |       |                           |
| 27                                                  | <b>I sometimes get annoying or negative remarks because of my age.</b>                                                                        | 1.0 | 9.9 | 0.88 | 0.74 | 0.76  | Included                  |
| 28                                                  | <b>I have enough opportunities to interact with younger generations.</b> ( <i>Moved to the domain of Civic participation and employment</i> ) | 1.0 | 9.3 | 0.88 | 0.58 | 0.76  | Included                  |
| 29                                                  | Sufficient activities are being undertaken to improve the neighborhood.                                                                       | 0.4 | -   | -    | -    | -     | Exclusion I-CVI score     |
| 30                                                  | I regularly associate with older people with a different background.                                                                          | 0.7 | -   | -    | -    | -     | Exclusion I-CVI consensus |
| 31                                                  | I believe that companies in my area and the government have tailored their services well to my needs.                                         | 0.9 | 8.6 | 0.75 | -    | -     | Exclusion I-CVI consensus |
| 32                                                  | I believe that staff working in the stores in my area take my needs into account.                                                             | 0.8 | 8.9 | 0.5  | -    | -     | Exclusion I-CVI consensus |
| 33                                                  | I believe that the media in my area present a realistic picture of older people.                                                              | 0.9 | 7.6 | 0.75 | -    | -     | Exclusion I-CVI consensus |
| 34                                                  | I believe that the posters and leaflets give a realistic image of older people.                                                               | 0.7 | -   | -    | -    | -     | Exclusion I-CVI consensus |
| 35                                                  | Older people are sufficiently involved in educational activities.                                                                             | 0.7 | -   | -    | -    | -     | Exclusion I-CVI consensus |
| 36                                                  | <b>I feel like a valued member of society.</b> ( <i>Moved to the domain of Civic participation and employment</i> )                           | 1.0 | 9.0 | 1.0  | 0.51 | 0.78  | Included                  |
| 37                                                  | Services (municipality, healthcare, welfare) are sufficiently accessible to people who are less well off financially.                         | 0.8 | -   | -    | -    | -     | Exclusion I-CVI consensus |
| 38                                                  | Sometimes I am confronted with false imaging of older people.                                                                                 | 0.7 | -   | -    | -    | -     | Exclusion I-CVI consensus |
| 39                                                  | <b>I sometimes face discrimination because of my age.</b>                                                                                     | 1.0 | 9.4 | 1.0  | 0.70 | 0.77  | Included                  |
| 40                                                  | In case of age discrimination, I know where to go for help or to file a complaint.                                                            | 0.9 | 8.7 | 1.0  | x    | -     | Communalities < 40        |
| <b>Domain 4: Civic Participation and Employment</b> |                                                                                                                                               |     |     |      |      |       |                           |

|                                                        |                                                                                                                                              |     |     |      |      |       |                                               |
|--------------------------------------------------------|----------------------------------------------------------------------------------------------------------------------------------------------|-----|-----|------|------|-------|-----------------------------------------------|
| 41                                                     | If I would like to, there are enough opportunities to do volunteer work that suits my interests and abilities.                               | 1.0 | 9.4 | 1.0  | 0.54 | <0.60 | Low loading CFA                               |
| 42                                                     | I feel sufficiently listened to in participation and decision making.                                                                        | 0.9 | 7.0 | 0.88 | x    | -     | Cross-loading EFA                             |
| 43                                                     | I am sufficiently involved in things that are going on in my neighbourhood.                                                                  | 0.9 | 9.3 | 0.88 | x    | -     | Cross-loading EFA                             |
| 44                                                     | I feel that municipal plans ABOUT older people have also been decided WITH older people.                                                     | 1.0 | 7.1 | 0.88 | x    | -     | Communalities <40                             |
| 45                                                     | I can give my opinion on the services and facilities that are of interest to me.                                                             | 0.8 | -   | -    | -    | -     | Exclusion I-CVI consensus                     |
| 46                                                     | I am involved in developments in the neighbourhood.                                                                                          | 0.8 | -   | -    | -    | -     | Exclusion I-CVI consensus                     |
| 47                                                     | I am well informed about what is going on in the neighbourhood.                                                                              | 0.9 | 8.7 | 1.0  | x    | -     | Cross-loading EFA                             |
| 48                                                     | I do volunteer work on a regular basis.                                                                                                      | 0.9 | 9.6 | 0.88 | x    | -     | Cross-loading EFA                             |
| 49                                                     | In the past month I have been active as a volunteer at least once.                                                                           | 0.7 | -   | -    | -    | -     | Exclusion I-CVI consensus                     |
| <b>Domain 5: Communication and Information</b>         |                                                                                                                                              |     |     |      |      |       |                                               |
| 50                                                     | There is enough information available about activities for seniors in my neighbourhood. <i>(Moved to the domain of Social participation)</i> | 0.9 | 9.1 | 1.0  | 0.35 | x     | Problematic standardised residual covariances |
| 51                                                     | There is sufficient municipal and neighborhood information available for older people.                                                       | 0.6 | -   | -    | -    | -     | Exclusion I-CVI score                         |
| 52                                                     | There is sufficient word of mouth regarding activities in the neighborhood.                                                                  | 0.6 | -   | -    | -    | -     | Exclusion I-CVI score                         |
| 53                                                     | There is sufficient word of mouth regarding activities in the neighborhood for people who are socially isolated.                             | 0.5 | -   | -    | -    | -     | Exclusion I-CVI score                         |
| 54                                                     | <b>Printed and digital information from the municipality and other social institutions is easy to read in terms of font and size.</b>        | 1.0 | 8.7 | 0.88 | 0.54 | 0.79  | <b>Included</b>                               |
| 55                                                     | <b>Printed and digital information from the municipality and other social institutions is written in understandable language.</b>            | 0.9 | 8.7 | 1.0  | 0.51 | 0.77  | <b>Included</b>                               |
| 56                                                     | When I call the municipality or another social institution I am well answered.                                                               | 0.9 | 9.0 | 1.0  | 0.58 | <0.50 | Low loading CFA                               |
| 57                                                     | If I have a complaint, I feel that I am listened to.                                                                                         | 0.9 | 9.0 | 0.88 | x    | -     | Cross-loading EFA                             |
| <b>Domain 6: Community Support and Health Services</b> |                                                                                                                                              |     |     |      |      |       |                                               |
| 58                                                     | I think the hospitals in my city are senior-friendly.                                                                                        | 0.6 | -   | -    | -    | -     | Exclusion I-CVI score                         |
| 59                                                     | The quality of care in my city is sufficient. <i>(Moved to the domain of Transportation)</i>                                                 | 0.9 | 9.0 | 0.88 | 0.49 | <0.50 | Low loading CFA                               |
| 60                                                     | I don't have to go far from home to visit a care service.                                                                                    | 0.8 | -   | -    | -    | -     | Exclusion I-CVI consensus                     |
| 61                                                     | If I provide family care, I receive enough support.                                                                                          | 1.0 | 9.0 | 0.88 | 0.74 | <0.50 | Low loading CFA                               |
| 62                                                     | I receive sufficient domestic help at home.                                                                                                  | 0.9 | 8.6 | 1.0  | 0.54 | <0.50 | Low loading CFA                               |
| 63                                                     | I can afford my healthcare costs.                                                                                                            | 0.8 | -   | -    | -    | -     | Exclusion I-CVI consensus                     |
| 64                                                     | <b>The supply of care and welfare in my city is enough for me.</b>                                                                           | 1.0 | 9.0 | 0.88 | 0.58 | 0.74  | <b>Included</b>                               |
| 65                                                     | The supply of care and welfare in my city is generally sufficient.                                                                           | 0.6 | -   | -    | -    | -     | Exclusion I-CVI score                         |
| 66                                                     | <b>When I am ill, I receive the care and help I need.</b>                                                                                    | 0.9 | 9.3 | 1    | 0.67 | 0.73  | <b>Included</b>                               |
| 67                                                     | <b>If necessary, I can easily reach care and welfare services by telephone and in person.</b>                                                | 0.9 | 7.7 | 1.0  | 0.76 | 0.79  | <b>Included</b>                               |
| 68                                                     | If I want to visit a nursing home, I can easily go there.                                                                                    | 0.7 | -   | -    | -    | -     | Exclusion I-CVI consensus                     |

|                                               |                                                                                                                  |     |     |      |      |       |                                               |
|-----------------------------------------------|------------------------------------------------------------------------------------------------------------------|-----|-----|------|------|-------|-----------------------------------------------|
| 69                                            | <b>I have enough information about care and welfare services in my neighbourhood.</b>                            | 1.0 | 8.7 | 1.0  | 0.54 | 0.79  | <b>Included</b>                               |
| 70                                            | Healthcare in my city is sufficiently coordinated and easy to get.                                               | 0.7 | -   | -    | -    | -     | Exclusion I-CVI consensus                     |
| 71                                            | <b>Care and welfare workers in my neighbourhood are sufficiently respectful.</b>                                 | 0.8 | 8.7 | 0.88 | 0.62 | 0.78  | <b>Included</b>                               |
| 72                                            | The care and welfare facilities I need are affordable for me.                                                    | 0.8 | -   | -    | -    | -     | Exclusion I-CVI consensus                     |
| 73                                            | Communication about crisis situations in my city has consideration for seniors.                                  | 1.0 | 7.6 | 0.88 | x    | -     | No Loading                                    |
| <b>Domain 7: Outdoor Spaces and Buildings</b> |                                                                                                                  |     |     |      |      |       |                                               |
| 74                                            | I can easily walk from A to B in my neighbourhood.                                                               | 0.8 | 9.7 | 1.0  | 0.53 | <0.60 | Low loading CFA                               |
| 75                                            | Public buildings in my city are easily accessible to me.                                                         | 1.0 | 9.4 | 1.0  | 0.52 | <0.70 | Low loading CFA                               |
| 76                                            | My neighbourhood and street are safe and secure. <i>(Moved to the domain of Respect and Social inclusion)</i>    | 0.9 | 7.6 | 1.0  | 0.51 | <0.50 | Low loading CFA                               |
| 77                                            | I can always park my car close to home. <i>(Moved to the domain of Transportation)</i>                           | 0.8 | 8.4 | 0.88 | x    | -     | Communalities < 40                            |
| 78                                            | Shops are close to my house.                                                                                     | 0.9 | 8.6 | 0.88 | x    | -     | Cross-loading EFA                             |
| 79                                            | Tiles in sidewalks are straight.                                                                                 | 0.8 | -   | -    | -    | -     | Exclusion I-CVI consensus                     |
| 80                                            | In my neighborhood, cycling and walking paths are well separated from each other.                                | 0.9 | 9.6 | 0.75 | -    | -     | Exclusion I-CVI consensus                     |
| 81                                            | There are parks near my home where I can go.                                                                     | 0.7 | -   | -    | -    | -     | Exclusion I-CVI consensus                     |
| 82                                            | There are enough seats and benches in the parks and shopping malls in my neighbourhood.                          | 1.0 | 9.0 | 1.0  | x    | -     | Communalities < 40                            |
| 83                                            | There are enough clean and accessible public toilets in my neighbourhood.                                        | 1.0 | 8.3 | 1.0  | 0.48 | <0.50 | Low loading CFA                               |
| 84                                            | The public space in my neighbourhood (park, street, square) is clean and pleasant to be in.                      | 1.0 | 9.6 | 1.0  | 0.40 | <0.50 | Low loading CFA                               |
| 85                                            | Pedestrian crossings in my neighbourhood are safe. <i>(Moved to the domain of Communication and Information)</i> | 0.9 | 9.6 | 0.88 | 0.59 | <0.60 | Low loading CFA                               |
| 86                                            | I have enough time to cross at pedestrian crossings in my neighbourhood.                                         | 1.0 | 9.6 | 0.88 | x    | -     | Cross-loading EFA                             |
| 87                                            | My city is sufficiently accessible with a walker or wheelchair.                                                  | 0.8 | -   | -    | -    | -     | Exclusion I-CVI consensus                     |
| 88                                            | <b>My neighbourhood is sufficiently accessible for a wheeled walker or wheelchair.</b>                           | 1.0 | 8.9 | 1.0  | 0.37 | 0.80  | <b>Included</b>                               |
| 89                                            | <b>The shops in my neighbourhood are sufficiently accessible with a wheeled walker or wheelchair.</b>            | 1.0 | 9.6 | 1.0  | 0.40 | 0.88  | <b>Included</b>                               |
| <b>Domain 8: Transportation</b>               |                                                                                                                  |     |     |      |      |       |                                               |
| 90                                            | <b>I can easily get on the bus or tram in my neighbourhood.</b>                                                  | 0.9 | 9.7 | 0.88 | 0.76 | 0.81  | <b>Included</b>                               |
| 91                                            | <b>The bus and tram stops in my neighbourhood are easy to reach and use.</b>                                     | 0.9 | 9.3 | 1.0  | 0.82 | 0.95  | <b>Included</b>                               |
| 92                                            | Public transportation in my city fits my needs.                                                                  | 0.9 | 9.3 | 0.88 | 0.74 | x     | Problematic standardised residual covariances |
| 93                                            | Public transportation in my city is affordable for me.                                                           | 0.7 | 9.1 | 0.88 | 0.40 | <0.50 | Low loading CFA                               |
| 94                                            | Streets are safe enough for older people.                                                                        | 0.7 | -   | -    | -    | -     | Exclusion I-CVI consensus                     |
| 95                                            | Public transport services are frequent.                                                                          | 0.7 | -   | -    | -    | -     | Exclusion I-CVI consensus                     |
| 96                                            | The bus and tram drivers in my city are considerate of me.                                                       | 0.9 | 9.1 | 0.88 | x    | -     | Cross-loading EFA                             |

|                                       |                                                                                                                       |            |            |            |             |             |                           |
|---------------------------------------|-----------------------------------------------------------------------------------------------------------------------|------------|------------|------------|-------------|-------------|---------------------------|
| 97                                    | The quality and availability of the community transport in my city (The Hague) is sufficient.                         | 0.8        | -          | -          | -           | -           | Exclusion I-CVI consensus |
| 98                                    | There are sufficient disabled parking spaces in my city. <i>(Moved to the domain of Outdoor spaces and buildings)</i> | 0.9        | 8.3        | 0.88       | 0.70        | <0.50       | Low loading CFA           |
| <b>Domain 9: Technology</b>           |                                                                                                                       |            |            |            |             |             |                           |
| 99                                    | If I could contact my doctor electronically, I would.                                                                 | 0.8        | -          | -          | -           | -           | Exclusion I-CVI consensus |
| 100                                   | If I could notify home care via an emergency response system, I would.                                                | 0.9        | 7.7        | 0.75       | -           | -           | Exclusion I-CVI consensus |
| 101                                   | I would be happy if the doctor could check on me remotely and see me in a digital consultation.                       | 1.0        | 8.1        | 1.0        | x           | -           | Communalities < 40        |
| 102                                   | I think technology supports and simplifies my life.                                                                   | 1.0        | 9.0        | 0.62       | -           | -           | Exclusion I-CVI consensus |
| 103                                   | I am able to understand and use the digital services provided by the municipality, bank and public transport.         | 1.0        | 8.9        | 1.0        | x           | -           | Communalities < 40        |
| 104                                   | I am sufficiently adept at digital care and e-health.                                                                 | 0.7        | -          | -          | -           | -           | Exclusion I-CVI consensus |
| 105                                   | I experience obstacles in my daily life due to technology.                                                            | 0.9        | 8.9        | 0.75       | -           | -           | Exclusion I-CVI consensus |
| <b>Domain 10: Financial Situation</b> |                                                                                                                       |            |            |            |             |             |                           |
| 106                                   | <b>My income is sufficient to cover my basic needs without any problems.</b>                                          | <b>1.0</b> | <b>9.4</b> | <b>1.0</b> | <b>0.87</b> | <b>0.96</b> | <b>Included</b>           |
| 107                                   | <b>I live well on my income.</b>                                                                                      | <b>0.9</b> | <b>9.9</b> | <b>1.0</b> | <b>0.88</b> | <b>0.90</b> | <b>Included</b>           |
| 108                                   | I have appealed to others for financial support one or more times in the past 12 months.                              | 0.8        | -          | -          | -           | -           | Exclusion I-CVI consensus |
| 109                                   | I am concerned about my financial situation.                                                                          | 0.7        | -          | -          | -           | -           | Exclusion I-CVI consensus |
| 110                                   | I know where to go with questions about money, for example at the municipality.                                       | 0.8        | -          | -          | -           | -           | Exclusion I-CVI consensus |

Item Content Validity Index (I-CVI)—number of experts rating a 3 or 4/total number of experts.

<sup>a</sup>—Items with I-CVI ≤ 0.69 were excluded, 0.69 < I-CVI < 0.90 were individually assessed, I-CVI ≥ 0.90 were retained

<sup>b</sup>—Items with I-CVI ≤ 0.78 were retained. AFCCQ average Scale-Content Validity Index (S-CVI<sub>ave</sub>) after step 3 = 0.95 (64 items). AFCCQ average Scale-Content Validity Index of the final instrument = 0.95 (23 items).

Bold items are included in the final AFCCQ. The grey cells indicate that items were excluded in the next step of the validation process. The letter x represents a non-numeric exclusion for next step.
